# Supplementary material
Source: PubMed Central journal article supplement (PMC6069176)
Supplement: JVI.00690-18_zjv016183760s1.pdf [file JVI.00690-18_zjv016183760s1.pdf]

r08062  
Week 8 PI

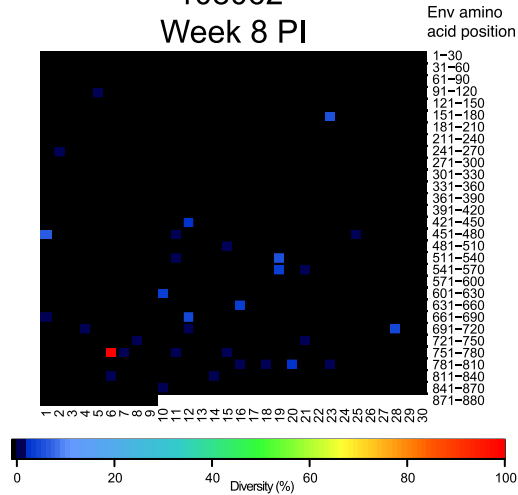

**Supporting Figure 1. *env* sequence diversity in week 8 PI plasma from r08062.** Heat map illustrating the levels of sequence diversity at each codon in the *env* open reading frame. The range of amino acids covered by each row is indicated on the right-hand side of the figure only as a reference because both synonymous and non-synonymous mutations are considered in these heat maps.
